# Supplementary material
Source: HighWire-hosted journal article supplement (http://jnis.bmj.com/highwire/filestream/143224/field_highwire_adjunct_files/2/neurintsurg-2015-011835supp_table3.xls)
Supplement: neurintsurg-2015-011835supp_table3.xls [file neurintsurg-2015-011835supp_table3.xls]

## Sheet: Blad1
Supplementary table 3. Control group charcteristics
Study Name	Allocated to Control group (N)	Received IV tPA (N)	Additional endovascular treatment (N)
ESCAPE	150	118 (79)	1
EXTEND 1A	35	35 (100)	0
IMS-III*	92	92 (100)	0
MR CLEAN	267	242 (91)	1
SWIFT PRIME	98	98 (100)	0
REVASCAT	103	80 (78)	0
IV=Intravenous, tPA = tissue plasminogen activator
*Subgroup with CT-angiography verified vessel occlusion
